# Supplementary material for: Transferrin-directed preparation of red-emitting copper nanoclusters for targeted imaging of transferrin receptor over-expressed cancer cells
Source: Royal Society of Chemistry journal article supplement (doi:10.1039/c4tb02130d), 2015-01-01
Supplement: c4tb02130d1.pdf [file c4tb02130d1.pdf]

## Supporting information

Transferrin-directed preparation of red-emitting copper nanoclusters for  
targeted imaging of transferrin receptor over-expressed cancer cells

Tong Zhao,<sup>a</sup> Xi-Wen He,<sup>a</sup> Wen-You Li,<sup>\* a</sup> and Yu-Kui Zhang<sup>a, b</sup>

<sup>a</sup> State Key Laboratory of Medicinal Chemical Biology (Nankai University), Collaborative  
Innovation Center of Chemical Science and Engineering (Tianjin), and Research Center for  
Analytical Sciences, College of Chemistry, Nankai University, Tianjin 300071, China

<sup>b</sup> National Chromatographic Research and Analysis Center, Dalian Institute of Chemical Physics,  
Chinese Academy of Sciences, Dalian 116011, P. R. China

---

\* Corresponding author. Tel.: +86 22 2349 4962; fax: +86 22 23502458.

E-mail address: [wyli@nankai.edu.cn](mailto:wyli@nankai.edu.cn) (W.-Y. Li).

1

2

3 Fig. S1 Optimization of the concentration of Trf and ascorbic acid. (A) The FL  
4 intensity of the Trf-Cu NCs under the different concentration of Trf (15, 30, 40, 50  
5 and 60 mg mL<sup>-1</sup>). The concentration of Cu<sup>2+</sup> was 10 mM, and the final concentration  
6 of ascorbic acid was 23.0 mM. The reaction temperature and time were 25 °C and 3.5  
7 h, respectively. (B) The FL intensity of the Trf-Cu NCs under the different final  
8 concentration of ascorbic acid (4.6, 11.5, 23.0, 34.5, 46.0 and 57.5 mM). The  
9 concentration of Trf and Cu<sup>2+</sup> were fixed at 40 mg mL<sup>-1</sup> and 10 mM, respectively.  
10 And the reaction temperature and time were 25 °C and 3.5 h.

1

2

3 Fig. S2 Optimization of the reaction time and temperature. (A) The FL intensity of the  
4 Trf-Cu NCs under different reaction time (1, 1.5, 2, 2.5, 3, 3.5, 4 and 5 h). The  
5 concentration of Trf and  $\text{Cu}^{2+}$  were fixed at  $40 \text{ mg mL}^{-1}$  and  $10 \text{ mM}$ , respectively. The  
6 reaction temperature was  $25 \text{ }^{\circ}\text{C}$ . And the final concentration of ascorbic acid was  $23.0$   
7  $\text{mM}$ . (B) The FL intensity of the Trf-Cu NCs under different reaction temperatures  
8 ( $15$ ,  $25$  and  $37 \text{ }^{\circ}\text{C}$ ). The concentration of Trf and  $\text{Cu}^{2+}$  were fixed at  $40 \text{ mg mL}^{-1}$  and  
9  $10 \text{ mM}$ , respectively. The reaction time was  $3.5 \text{ h}$ . The final concentration of ascorbic  
10 acid was  $23.0 \text{ mM}$ .

1

2

3 Fig. S3 Fluorescence intensity of the Trf-Cu NCs at different time intervals at 15 °C  
4 (A) and 37 °C (B). The concentration of Trf and Cu<sup>2+</sup> were fixed at 40 mg mL<sup>-1</sup> and  
5 10 mM, respectively. And the final concentration of ascorbic acid was 23.0 mM.

1

2 Fig. S4 The emission wavelength (■) and the corresponding FL intensity (●) of the  
3 Trf-Cu NCs with three different Cu precursors (1: CuSO<sub>4</sub>, 2: CuCl<sub>2</sub>, 3: Cu(NO<sub>3</sub>)<sub>2</sub>).

4

5

6

7

8

9

10

11

12

13

14

15

16

17

18

1

2 Fig. S5 XPS spectrum of the Trf-Cu NCs.

3

4

5

6
